# Supplementary material
Source: publisher figshare collection journal article supplement (https://acs.figshare.com/ndownloader/files/5124196)
Supplement: Supplementary file 1 [file 5124196]

data_wl0017
_audit_creation_date 'Nov. 23, 04'
_audit_creation_method 'SHELXL-97'
_audit_update_record 'Dec. 21, 04'
_publ_requested_journal 'test'
_publ_requested_category '#'
_publ_contact_author_name 'Omar W. Steward'
_publ_contact_author_address
;Department of Chemistry and Biochemistry
Duquesne University
Pittsburgh, PA 15282 USA
;
_publ_contact_letter
;The crystal structure of trans-4-tert-butyl-1-
(hydroxymethyl)cyclohexanecarbonitrile is reported
as supporting information in the article entitled,
Cyclic Nitriles: Diastereoselective Alkylations, which
has been submitted to the Journal of Organic Chemistry
for publication.
;
_publ_requested_coeditor_name ?
_publ_contact_author_phone ' (412) 396 6338 '
_publ_contact_author_fax ' (412) 396 5683 '
_publ_contact_author_email ' steward@duq.edu '
loop_
_publ_author_name
_publ_author_address
;Fraser F. Fleming
;
;Department of Chemistry and Biochemistry
Duquesne University
Pittsburgh, PA 15282 USA
;
;Subrahmanyam Gudipati
;
;Department of Chemistry and Biochemistry
Duquesne University
Pittsburgh, PA 15282 USA
;
;Zhiyu Zhang
;
;Department of Chemistry and Biochemistry
Duquesne University
Pittsburgh, PA 15282 USA
;
;Wang Liu
;
;Department of Chemistry and Biochemistry
Duquesne University
Pittsburgh, PA 15282 USA
;
;Omar W. Steward
;
;Department of Chemistry and Biochemistry
Duquesne University
Pittsburgh, PA 15282 USA
;
_publ_section_title
;
Cyclic Nitriles: Diastereoselective Alkylations
;
_publ_section_title_footnote 'ENTER ANY FOOTNOTES TO TITLE'
_publ_section_abstract
;Highly stereoselective alkylations of conformationally
locked trans-4-tert-butyl-1-(hydroxymethyl)cyclohexane-
carbonitrile (i) occur by conversion to the MgBr or
-CuMe derivatives. Bromine-magnesium and bromine-copper
exchange reactions generate C-metalated nitriles which
selectively alkylate electrophiles from the equatorial
orientation, whereas conventional lithium amide deprotonation-
alkylation through a putative N-lithionitrile is only modestly
stereoselective. Collectively, high alkylation
stereoslectivities correlate with retentive alkylations
of C-metalated nitriles whereas the alkylations of the
corresponding N-lithionitrile are moderately selective.
;
_chemical_name_systematic
;
trans-4-tert-butyl-1-(hydroxymethyl)cyclohexanecarbonitrile
;
_chemical_name_common ?
_chemical_melting_point '345-347 K'
_chemical_formula_moiety 'C12 H21 N O'
_chemical_formula_sum 'C12 H21 N O'
_chemical_formula_weight 195.30
loop_
_atom_type_symbol
_atom_type_description
_atom_type_scat_dispersion_real
_atom_type_scat_dispersion_imag
_atom_type_scat_source
'C' 'C' 0.0033 0.0016
'International Tables Vol C Tables 4.2.6.8 and 6.1.1.4'
'H' 'H' 0.0000 0.0000
'International Tables Vol C Tables 4.2.6.8 and 6.1.1.4'
'N' 'N' 0.0061 0.0033
'International Tables Vol C Tables 4.2.6.8 and 6.1.1.4'
'O' 'O' 0.0106 0.0060
'International Tables Vol C Tables 4.2.6.8 and 6.1.1.4'
_symmetry_cell_setting Monoclinic
_symmetry_space_group_name_H-M P2(1)/c
_symmetry_space_group_name_Hall '-P 2ybc'
loop_
_symmetry_equiv_pos_as_xyz
'x, y, z'
'-x, y+1/2, -z+1/2'
'-x, -y, -z'
'x, -y-1/2, z-1/2'
_cell_length_a 18.0517(11)
_cell_length_b 6.2044(4)
_cell_length_c 10.8293(7)
_cell_angle_alpha 90.00
_cell_angle_beta 91.692(3)
_cell_angle_gamma 90.00
_cell_volume 1212.35(13)
_cell_formula_units_Z 4
_cell_measurement_temperature 296(2)
_cell_measurement_reflns_used 3145
_cell_measurement_theta_min 2.26
_cell_measurement_theta_max 19.19
_exptl_crystal_description plate
_exptl_crystal_colour colorless
_exptl_crystal_size_max 0.47
_exptl_crystal_size_mid 0.20
_exptl_crystal_size_min 0.07
_exptl_crystal_density_meas 0
_exptl_crystal_density_diffrn 1.070
_exptl_crystal_density_method 'not measured'
_exptl_crystal_F_000 432
_exptl_absorpt_coefficient_mu 0.067
_exptl_absorpt_correction_type none
_exptl_absorpt_correction_T_min 0.9692
_exptl_absorpt_correction_T_max 0.9953
_exptl_absorpt_process_details ?
_exptl_special_details
;The trans-4-tert-butyl-1-(hydroxymethyl)cyclohexane-
carbonitrile (i) compound was
synthesized as described in the paper
.
The compound i was crystallized from 6:1
hexanes:ethyl acetate, m.p. 345-347 K
;
_diffrn_ambient_temperature 296(2)
_diffrn_radiation_wavelength 0.71073
_diffrn_radiation_type MoK\a
_diffrn_radiation_source 'fine-focus sealed tube'
_diffrn_radiation_monochromator graphite
_diffrn_measurement_device_type 'CCD area detector'
_diffrn_measurement_method 'phi and omega scans'
_diffrn_detector_area_resol_mean ?
_diffrn_standards_number ?
_diffrn_standards_interval_count ?
_diffrn_standards_interval_time ?
_diffrn_standards_decay_% ?
_diffrn_reflns_number 27223
_diffrn_reflns_av_R_equivalents 0.0711
_diffrn_reflns_av_sigmaI/netI 0.0545
_diffrn_reflns_limit_h_min -24
_diffrn_reflns_limit_h_max 24
_diffrn_reflns_limit_k_min -8
_diffrn_reflns_limit_k_max 8
_diffrn_reflns_limit_l_min -13
_diffrn_reflns_limit_l_max 14
_diffrn_reflns_theta_min 1.13
_diffrn_reflns_theta_max 28.41
_reflns_number_total 3032
_reflns_number_gt 1380
_reflns_threshold_expression >2sigma(I)
_computing_data_collection 'Bruker SMART'
_computing_cell_refinement 'Bruker SMART'
_computing_data_reduction 'Bruker SAINT'
_computing_structure_solution 'SHELXS-97 (Sheldrick, 1990)'
_computing_structure_refinement 'SHELXL-97 (Sheldrick, 1997)'
_computing_molecular_graphics 'Bruker SHELXTL'
_computing_publication_material 'Bruker SHELXTL'
_refine_special_details
;
Refinement of F^2^ against ALL reflections. The weighted R-factor wR and
goodness of fit S are based on F^2^, conventional R-factors R are based
on F, with F set to zero for negative F^2^. The threshold expression of
F^2^ > 2sigma(F^2^) is used only for calculating R-factors(gt) etc. and is
not relevant to the choice of reflections for refinement. R-factors based
on F^2^ are statistically about twice as large as those based on F, and R-
factors based on ALL data will be even larger.
;
_refine_ls_structure_factor_coef Fsqd
_refine_ls_matrix_type full
_refine_ls_weighting_scheme calc
_refine_ls_weighting_details
'calc w=1/[\s^2^(Fo^2^)+(0.1310P)^2^+0.0000P] where P=(Fo^2^+2Fc^2^)/3'
_atom_sites_solution_primary direct
_atom_sites_solution_secondary difmap
_atom_sites_solution_hydrogens geom
_refine_ls_hydrogen_treatment none
_refine_ls_extinction_method none
_refine_ls_extinction_coef ?
_refine_ls_number_reflns 3032
_refine_ls_number_parameters 131
_refine_ls_number_restraints 0
_refine_ls_R_factor_all 0.1407
_refine_ls_R_factor_gt 0.0603
_refine_ls_wR_factor_ref 0.2339
_refine_ls_wR_factor_gt 0.1719
_refine_ls_goodness_of_fit_ref 0.997
_refine_ls_restrained_S_all 0.997
_refine_ls_shift/su_max 0.000
_refine_ls_shift/su_mean 0.000
loop_
_atom_site_label
_atom_site_type_symbol
_atom_site_fract_x
_atom_site_fract_y
_atom_site_fract_z
_atom_site_U_iso_or_equiv
_atom_site_adp_type
_atom_site_occupancy
_atom_site_symmetry_multiplicity
_atom_site_calc_flag
_atom_site_refinement_flags
_atom_site_disorder_assembly
_atom_site_disorder_group
C1 C 0.36835(11) 0.5407(3) 0.26535(18) 0.0528(5) Uani 1 1 d . . .
C5 C 0.23921(12) 0.3835(3) 0.2341(2) 0.0625(6) Uani 1 1 d . . .
H5A H 0.2026 0.2940 0.2733 0.075 Uiso 1 1 calc R . .
H5B H 0.2515 0.3156 0.1567 0.075 Uiso 1 1 calc R . .
C3 C 0.26522(11) 0.7535(3) 0.1575(2) 0.0662(6) Uani 1 1 d . . .
H3A H 0.2784 0.7039 0.0761 0.079 Uiso 1 1 calc R . .
H3B H 0.2450 0.8977 0.1486 0.079 Uiso 1 1 calc R . .
C4 C 0.20552(12) 0.6051(3) 0.2072(2) 0.0589(6) Uani 1 1 d . . .
H4 H 0.1923 0.6648 0.2874 0.071 Uiso 1 1 calc R . .
C6 C 0.30853(11) 0.3945(3) 0.3173(2) 0.0616(6) Uani 1 1 d . . .
H6A H 0.3285 0.2503 0.3281 0.074 Uiso 1 1 calc R . .
H6B H 0.2952 0.4475 0.3979 0.074 Uiso 1 1 calc R . .
C2 C 0.33494(11) 0.7635(3) 0.2395(2) 0.0644(6) Uani 1 1 d . . .
H2A H 0.3232 0.8311 0.3173 0.077 Uiso 1 1 calc R . .
H2B H 0.3715 0.8526 0.1999 0.077 Uiso 1 1 calc R . .
C8 C 0.43687(12) 0.5574(4) 0.3520(2) 0.0673(6) Uani 1 1 d . . .
H8A H 0.4694 0.6685 0.3215 0.081 Uiso 1 1 calc R . .
H8B H 0.4214 0.6007 0.4333 0.081 Uiso 1 1 calc R . .
C9 C 0.13281(13) 0.5960(4) 0.1287(2) 0.0720(7) Uani 1 1 d . . .
C7 C 0.39223(11) 0.4511(4) 0.1480(2) 0.0621(6) Uani 1 1 d . . .
C10 C 0.10416(16) 0.8239(5) 0.1007(3) 0.1078(10) Uani 1 1 d . . .
H10A H 0.1021 0.9046 0.1761 0.162 Uiso 1 1 calc R . .
H10B H 0.0554 0.8154 0.0629 0.162 Uiso 1 1 calc R . .
H10C H 0.1369 0.8944 0.0453 0.162 Uiso 1 1 calc R . .
C11 C 0.07298(14) 0.4767(5) 0.1988(3) 0.1046(10) Uani 1 1 d . . .
H11A H 0.0883 0.3304 0.2130 0.157 Uiso 1 1 calc R . .
H11B H 0.0274 0.4780 0.1507 0.157 Uiso 1 1 calc R . .
H11C H 0.0656 0.5468 0.2765 0.157 Uiso 1 1 calc R . .
C12 C 0.14415(16) 0.4803(5) 0.0044(2) 0.0931(9) Uani 1 1 d . . .
H12A H 0.1843 0.5469 -0.0376 0.140 Uiso 1 1 calc R . .
H12B H 0.0996 0.4907 -0.0460 0.140 Uiso 1 1 calc R . .
H12C H 0.1556 0.3313 0.0194 0.140 Uiso 1 1 calc R . .
N1 N 0.40826(12) 0.3822(4) 0.0548(2) 0.0895(7) Uani 1 1 d . . .
O1 O 0.47658(8) 0.3626(3) 0.36234(14) 0.0770(5) Uani 1 1 d . . .
H1 H 0.4601 0.2904 0.4187 0.115 Uiso 1 1 calc R . .
loop_
_atom_site_aniso_label
_atom_site_aniso_U_11
_atom_site_aniso_U_22
_atom_site_aniso_U_33
_atom_site_aniso_U_23
_atom_site_aniso_U_13
_atom_site_aniso_U_12
C1 0.0609(11) 0.0494(11) 0.0481(11) -0.0047(9) 0.0044(9) -0.0056(9)
C5 0.0665(13) 0.0483(12) 0.0726(14) 0.0100(10) 0.0018(10) -0.0065(9)
C3 0.0764(14) 0.0405(12) 0.0820(16) 0.0042(10) 0.0069(12) 0.0033(10)
C4 0.0651(12) 0.0506(12) 0.0614(12) -0.0022(9) 0.0073(10) 0.0040(9)
C6 0.0680(13) 0.0526(12) 0.0642(13) 0.0085(10) 0.0015(10) -0.0037(9)
C2 0.0748(13) 0.0430(12) 0.0758(15) -0.0049(10) 0.0114(11) -0.0063(9)
C8 0.0702(14) 0.0733(15) 0.0584(13) -0.0062(11) 0.0009(11) -0.0090(11)
C9 0.0666(14) 0.0720(15) 0.0772(16) 0.0031(12) -0.0019(12) 0.0068(11)
C7 0.0613(12) 0.0642(13) 0.0604(14) -0.0042(11) -0.0032(10) 0.0062(10)
C10 0.0937(19) 0.089(2) 0.139(3) 0.0102(17) -0.0185(18) 0.0313(16)
C11 0.0623(15) 0.120(2) 0.132(3) 0.011(2) 0.0030(16) -0.0075(15)
C12 0.0987(19) 0.100(2) 0.0798(19) -0.0045(15) -0.0194(15) 0.0000(16)
N1 0.0871(15) 0.1132(19) 0.0682(14) -0.0224(12) 0.0005(11) 0.0176(12)
O1 0.0703(10) 0.0963(13) 0.0644(11) 0.0141(8) 0.0039(8) 0.0064(8)
_geom_special_details
;
All esds (except the esd in the dihedral angle between two l.s. planes)
are estimated using the full covariance matrix. The cell esds are taken
into account individually in the estimation of esds in distances, angles
and torsion angles; correlations between esds in cell parameters are only
used when they are defined by crystal symmetry. An approximate (isotropic)
treatment of cell esds is used for estimating esds involving l.s. planes.
;
loop_
_geom_bond_atom_site_label_1
_geom_bond_atom_site_label_2
_geom_bond_distance
_geom_bond_site_symmetry_2
_geom_bond_publ_flag
C1 C7 1.464(3) . ?
C1 C6 1.530(3) . ?
C1 C2 1.530(3) . ?
C1 C8 1.534(3) . ?
C5 C6 1.522(3) . ?
C5 C4 1.528(3) . ?
C3 C2 1.520(3) . ?
C3 C4 1.528(3) . ?
C4 C9 1.544(3) . ?
C8 O1 1.408(3) . ?
C9 C11 1.529(4) . ?
C9 C10 1.533(4) . ?
C9 C12 1.545(4) . ?
C7 N1 1.141(3) . ?
loop_
_geom_angle_atom_site_label_1
_geom_angle_atom_site_label_2
_geom_angle_atom_site_label_3
_geom_angle
_geom_angle_site_symmetry_1
_geom_angle_site_symmetry_3
_geom_angle_publ_flag
C7 C1 C6 108.86(16) . . ?
C7 C1 C2 107.99(17) . . ?
C6 C1 C2 108.91(16) . . ?
C7 C1 C8 107.69(16) . . ?
C6 C1 C8 112.34(17) . . ?
C2 C1 C8 110.93(17) . . ?
C6 C5 C4 112.86(16) . . ?
C2 C3 C4 113.51(17) . . ?
C3 C4 C5 109.18(16) . . ?
C3 C4 C9 115.16(17) . . ?
C5 C4 C9 113.53(17) . . ?
C5 C6 C1 112.69(16) . . ?
C3 C2 C1 112.65(16) . . ?
O1 C8 C1 112.98(18) . . ?
C11 C9 C10 107.8(2) . . ?
C11 C9 C4 110.3(2) . . ?
C10 C9 C4 110.6(2) . . ?
C11 C9 C12 108.7(2) . . ?
C10 C9 C12 108.0(2) . . ?
C4 C9 C12 111.38(18) . . ?
N1 C7 C1 177.5(2) . . ?
loop_
_geom_torsion_atom_site_label_1
_geom_torsion_atom_site_label_2
_geom_torsion_atom_site_label_3
_geom_torsion_atom_site_label_4
_geom_torsion
_geom_torsion_site_symmetry_1
_geom_torsion_site_symmetry_2
_geom_torsion_site_symmetry_3
_geom_torsion_site_symmetry_4
_geom_torsion_publ_flag
C2 C3 C4 C5 -52.8(2) . . . . ?
C2 C3 C4 C9 178.14(17) . . . . ?
C6 C5 C4 C3 53.1(2) . . . . ?
C6 C5 C4 C9 -176.89(18) . . . . ?
C4 C5 C6 C1 -56.3(2) . . . . ?
C7 C1 C6 C5 -62.9(2) . . . . ?
C2 C1 C6 C5 54.6(2) . . . . ?
C8 C1 C6 C5 177.91(17) . . . . ?
C4 C3 C2 C1 55.1(2) . . . . ?
C7 C1 C2 C3 64.2(2) . . . . ?
C6 C1 C2 C3 -53.8(2) . . . . ?
C8 C1 C2 C3 -177.99(17) . . . . ?
C7 C1 C8 O1 -52.2(2) . . . . ?
C6 C1 C8 O1 67.7(2) . . . . ?
C2 C1 C8 O1 -170.16(18) . . . . ?
C3 C4 C9 C11 -169.7(2) . . . . ?
C5 C4 C9 C11 63.4(3) . . . . ?
C3 C4 C9 C10 -50.6(3) . . . . ?
C5 C4 C9 C10 -177.5(2) . . . . ?
C3 C4 C9 C12 69.5(2) . . . . ?
C5 C4 C9 C12 -57.4(2) . . . . ?
C6 C1 C7 N1 62(6) . . . . ?
C2 C1 C7 N1 -56(6) . . . . ?
C8 C1 C7 N1 -176(6) . . . . ?
loop_
_geom_hbond_atom_site_label_D
_geom_hbond_atom_site_label_H
_geom_hbond_atom_site_label_A
_geom_hbond_distance_DH
_geom_hbond_distance_HA
_geom_hbond_distance_DA
_geom_hbond_angle_DHA
_geom_hbond_site_symmetry_A
'O1' 'H1' 'N1' '0.82' '2.07' '2.885(3)' '174.3' '4_566'
_diffrn_measured_fraction_theta_max 0.994
_diffrn_reflns_theta_full 28.41
_diffrn_measured_fraction_theta_full 0.994
_refine_diff_density_max 0.239
_refine_diff_density_min -0.251
_refine_diff_density_rms 0.068
